# Supplementary material for: Nano-sulfur confined in a 3D carbon nanotube/graphene network as a free-standing cathode for high-performance Li–S batteries
Source: Royal Society of Chemistry journal article supplement (doi:10.1039/d2na00494a), 2022-01-01
Supplement: d2na00494a1.pdf [file d2na00494a1.pdf]

Electronic Supplementary Material (ESI) for  
Nanoscale Advances. This journal is © The Royal  
Society of Chemistry 2022

Supporting Information

## **Nano sulfur confined in 3D carbon nanotube/graphene network as a free-standing cathode for high-performance Li-S batteries**

Meng Wei<sup>1, 2, \*</sup>, Huiqin Zhu<sup>1</sup>, Pengfei Zhai<sup>1</sup>, Longkun An<sup>1</sup>, Hengyi Geng<sup>1</sup>, Song Xu<sup>1, \*</sup>, Tao Zhang<sup>1</sup>

<sup>1</sup>School of Materials Science and Engineering, Zhengzhou University of Aeronautics, Zhengzhou 450046;

Henan Key laboratory of Aeronautical materials and Application Technology, Zhengzhou 450015, China

<sup>2</sup>Collaborative Innovation Center of Aviation Economy Development, Henan Province

\* Corresponding author: [weimeng1005@zua.edu.cn](mailto:weimeng1005@zua.edu.cn); [songxu@zua.edu.cn](mailto:songxu@zua.edu.cn)

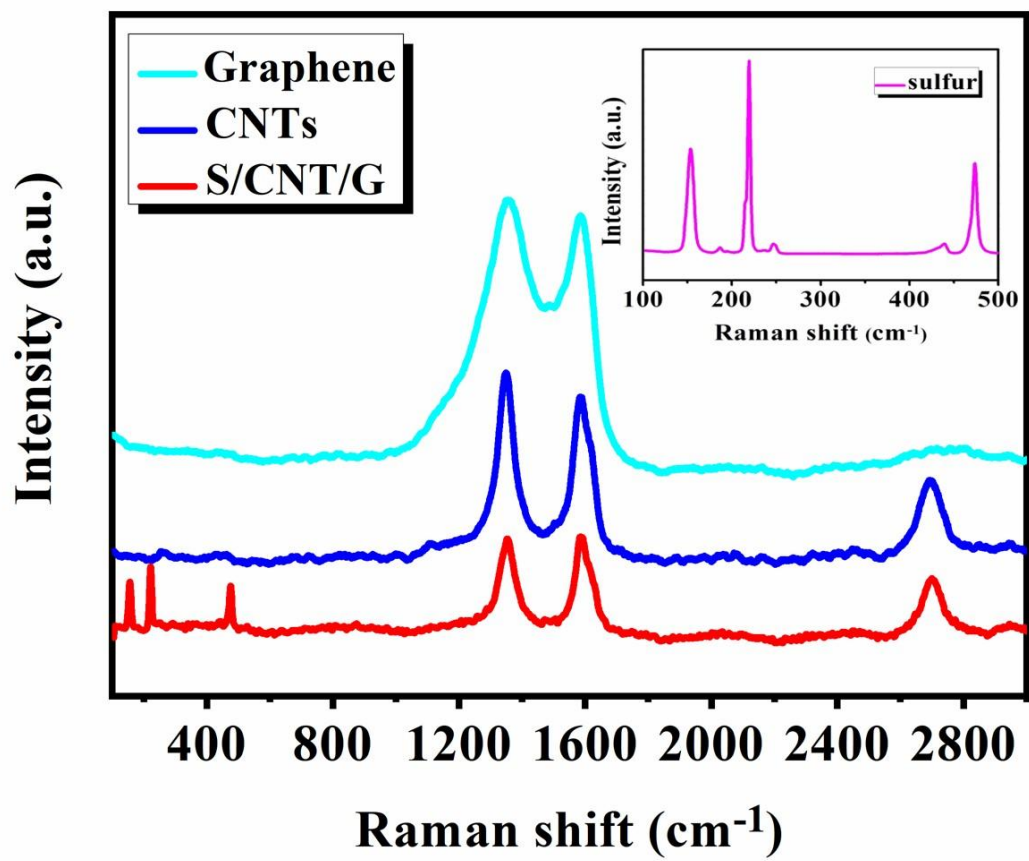

Fig.S1 Raman spectra of the graphene, CNT and S/CNT/G composite.

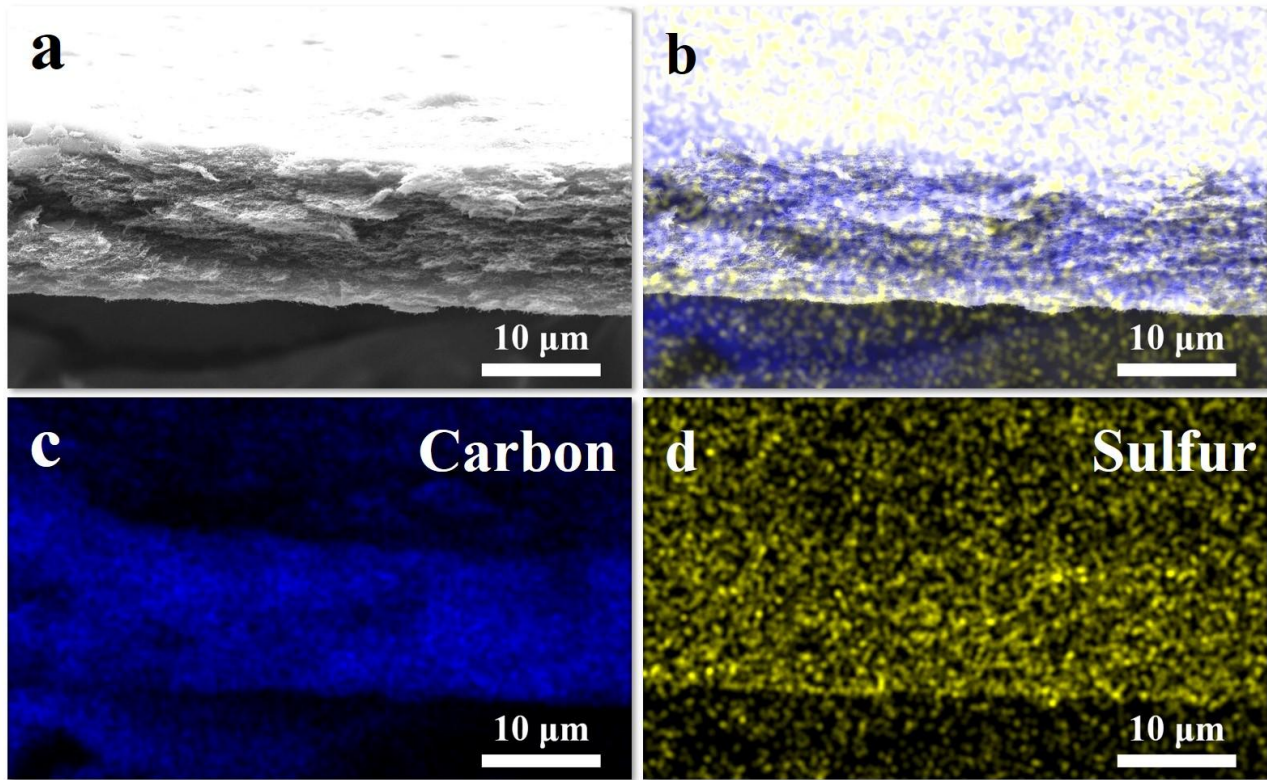

Fig.S2 The cross-sectional images and EDX elemental analysis of the free-standing S/CNT/G electrode.

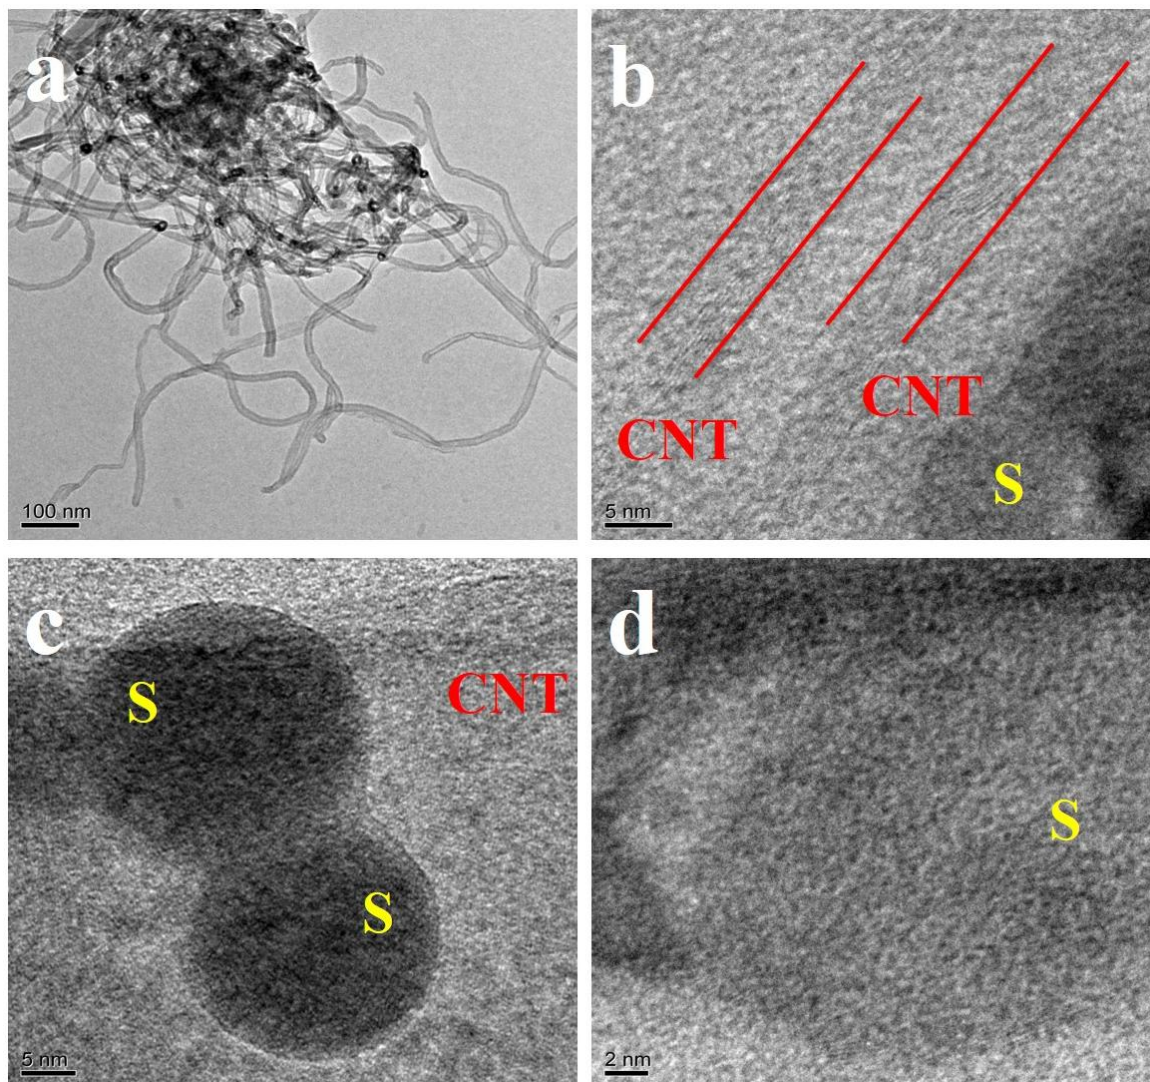

Fig.S3 HTEM images at different magnifications, CNT (a), S/CNT/G (b), nano sulfur (c)-(d).

| <b>State</b>     | <b><math>R_s(\Omega)</math></b> | <b><math>R_{ct}(\Omega)</math></b> | <b><math>R_f(\Omega)</math></b> |
|------------------|---------------------------------|------------------------------------|---------------------------------|
| Fresh cell       | 5.0 $\Omega$                    | 34.7 $\Omega$                      | 98.9 $\Omega$                   |
| After 200 cycles | 7.2 $\Omega$                    | 9.9 $\Omega$                       |                                 |

$R_s$ : internal resistance;

$R_{ct}$ : charge transfer resistance;

$R_f$ : interfacial resistance between electrolyte/electrode.

Table S2. Sulfur loading and electrochemical properties of flexible sulfur-based cathode in this work and literature.

| Material         | Rate /Current density | Capacity after cycling (Cycle number) | Sulfur loading              | Reference |
|------------------|-----------------------|---------------------------------------|-----------------------------|-----------|
| S/CNT/G          | 0.5 C                 | 593 (200)                             | 1.5-2 mg cm <sup>-2</sup>   | This work |
| GO/CNT           | 0.2 C                 | 1003.59 (50)                          | 1.1 mg cm <sup>-2</sup>     | S1        |
| G/SWCNT-S        | 5 C                   | 650 (100)                             |                             | S2        |
| S@MWCNT-PANI-G   | 0.2 C                 | 784 (100)                             | 0.8-1 mg cm <sup>-2</sup>   | S3        |
| graphene/S       | 0.2 A g <sup>-1</sup> | 840 (100)                             | 0.86 mg cm <sup>-2</sup>    | S4        |
| NiO-CNT/S        | 0.1 C                 | 609 (160)                             | 2.1 mg cm <sup>-2</sup>     | S5        |
| ZnS-CNTs/S@NH    | 0.5 C                 | 760 (150)                             | 1.8-2.3 mg cm <sup>-2</sup> | S6        |
| S@HZIF/CNT       | 0.5 C                 | 624.6 (500)                           | 2.13 mg cm <sup>-2</sup>    | S7        |
| FeOOH/CNT@S      | 1 A g <sup>-1</sup>   | 742 (200)                             | 1.71 mg cm <sup>-2</sup>    | S8        |
| FMC@S            | 0.5 C                 | 666 (350)                             | 1 mg cm <sup>-2</sup>       | S9        |
| rGO/g-C3N4/CNT/S | 0.2 C                 | 820 (200)                             | 4.2 mg cm <sup>-2</sup>     | S10       |

References:

- S1 . K. Lee, S. J. Kim, Y. J. Kim, H. Choi, D. W. Kim, H. J. Jeon, C. W. Ahn, J. W. Lee and H. T. Jung, *Adv. Mater. Interfaces*, 2019, **6**, 1801992.
- S2 . Q. Zhao, X. F. Liu, Q. Zhang, G. L. Tian, J. Q. Huang, W. C. Zhu, F. Wei. *Acs Nano*, **6**, 10759-10769.
- S3 . Deng, L. Yao, Q.-A. Huang, Q. Su, J. Zhang, F. Zhang and G. Du, *RSC Adv*, 2017, **7**, 9819-9825.
- S4 . Feng, H. Zhang, Y. Zhang and X. Qu, *ACS Omega*, 2019, **4**, 16352-16359.
- S5 . Jia, B. Liu, J. Liu, S. Zhang, Z. Sun, X. He, H. Li, G. Wang and H. Chang, *RSC Adv*, 2021, **11**, 10753-10759.
- S6 . Shi, C. Zhao, Y. Zhou, H. Yin, C. Song, L. Qin, Z. Wang, H. Shao and K. Yu, *J. Colloid Interface Sci.*, 2021, **599**, 416-426.
- S7 . Wu, L. Wang, S. Chen, X. Zhu, Q. Deng, J. Wang, Z. Zeng and S. Deng, *Chem. Eng. J.*, 2021, **404**, 126579.
- S8 . Li, Y. Xu and J. Wang, *ACS Appl. Energy Mater*, 2021, **4**, 8368-8376.
- S9 . Chen, X. Y. Yue, X. L. Li, J. Bao, Q. Q. Qiu, X. J. Wu, X. Zhang and Y. N. Zhou, *ACS Appl. Mater. Interfaces*, 2020, **12**, 2354-2361.
- S10 Wang, Z. Meng, W. Yang, X. Yan, R. Guo and W. Q. Han, *ACS Appl. Mater. Interfaces*, 2019, **11**, 819-827.

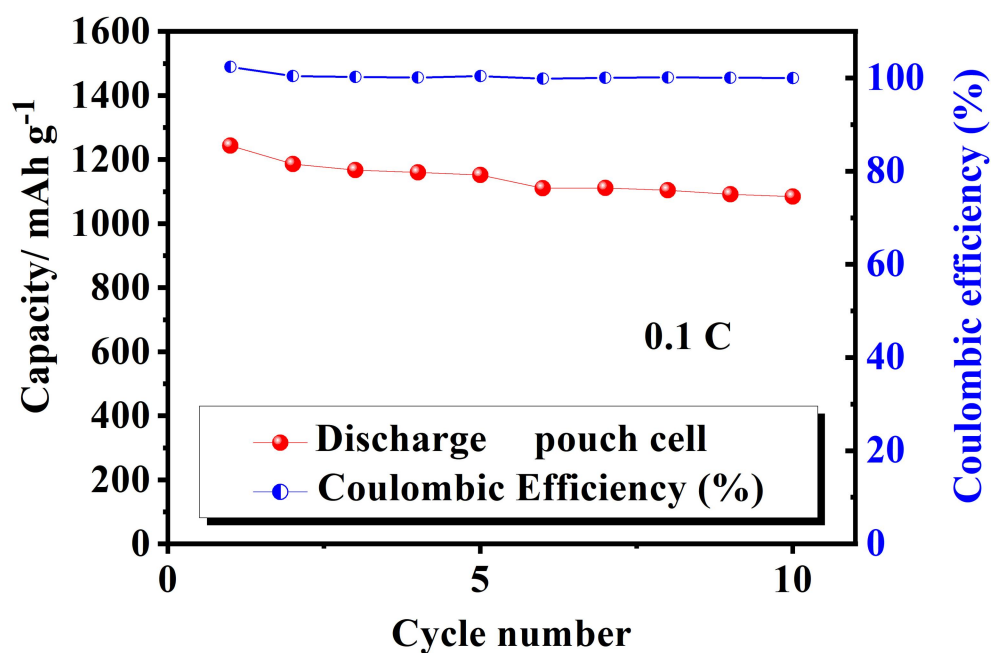

Fig. S4. Cycling performance of the pouch battery assembled by Li/copper foam anode and S/CNT/G film cathode at 0.1C.

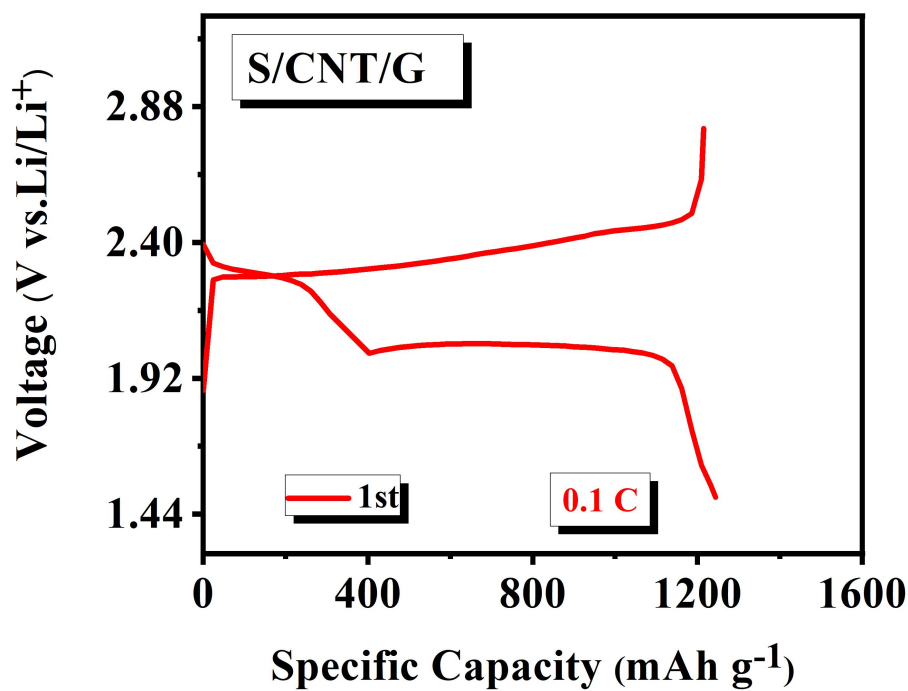

Fig. S5. Typical discharge-charge voltage curve of pouch battery at 0.1 C between 1.5 and 2.8 V.
